# Supplementary material
Source: PubMed Central journal article supplement (PMC7338025)
Supplement: NIHMS1604291-supplement-table_1_supplementary_materials.pdf [file NIHMS1604291-supplement-table_1_supplementary_materials.pdf]

Table S1

*Unstandardized, Standardized, and Significance Levels for Model in Figure 1 (Standard Errors in Parentheses)*

| <i>Parameter Estimate</i>                                  | <i>Unstandardized</i> | <i>Standardized</i> | <i>p</i> |
|------------------------------------------------------------|-----------------------|---------------------|----------|
| <b>Structural Model: Lag and Cross-Lag Estimates</b>       |                       |                     |          |
| MD Age 2 → MD Age 5                                        | .18 (.04)             | .17                 | .000     |
| OB Age 2 → MD Age 5                                        | 2.01 (1.01)           | .07                 | .046     |
| MD Age 3 → MD Age 5                                        | .24 (.04)             | .24                 | .000     |
| MD Age 4 → MD Age 5                                        | .38 (.04)             | .36                 | .000     |
| OB Age 2 → OB Age 5                                        | .11 (.04)             | .10                 | .008     |
| OB Age 3 → OB Age 5                                        | .23 (.05)             | .22                 | .000     |
| OB Age 4 → OB Age 5                                        | .43 (.05)             | .42                 | .000     |
| MD Age 4 → OB Age 5                                        | .01 (.001)            | .11                 | .001     |
| MD Age 2 → MD Age 4                                        | .25 (.04)             | .24                 | .000     |
| MD Age 3 → MD Age 4                                        | .39 (.04)             | .40                 | .000     |
| OB Age 3 → MD Age 4                                        | 2.41 (.88)            | .10                 | .006     |
| OB Age 2 → OB Age 4                                        | .17 (.04)             | .15                 | .000     |
| OB Age 3 → OB Age 4                                        | .60 (.04)             | .60                 | .000     |
| MD Age 2 → MD Age 3                                        | .44 (.04)             | .42                 | .000     |
| OB Age 2 → MD Age 3                                        | 4.06 (1.06)           | .14                 | .000     |
| OB Age 2 → OB Age 3                                        | .53 (.04)             | .45                 | .000     |
| MD Age 2 → OB Age 3                                        | .01 (.002)            | .11                 | .002     |
| <b>Structural Model: Covariance and Residual Estimates</b> |                       |                     |          |
| Covariance between MD Age 5 and OB Age 5                   | .71 (.13)             | .25                 | .000     |
| Covariance between MD Age 4 and OB Age 4                   | .33 (.12)             | .12                 | .007     |
| Covariance between MD Age 3 and OB Age 3                   | .99 (.16)             | .26                 | .000     |
| Covariance between MD Age 2 and OB Age 2                   | .64 (.16)             | .16                 | .000     |
| Residual for MD Age 5                                      | 75.60 (4.63)          | .58                 | .000     |
| Residual for OB Age 5                                      | .11 (.01)             | .53                 | .000     |
| Residual for MD Age 4                                      | 76.42 (4.58)          | .64                 | .000     |
| Residual for OB Age 4                                      | .10 (.01)             | .52                 | .000     |
| Residual for MD Age 3                                      | 94.99 (5.49)          | .77                 | .000     |
| Residual for OB Age 3                                      | .15 (.01)             | .75                 | .000     |

*Note:*  $\chi^2(7, N = 677) = 4.08, p = .771$ ; CFI = 1.00; RMSEA = .00 [.00, .03]; SRMR = .01. Effects

of covariates not shown. MD = Maternal Depressive Symptoms. OB = Oppositional Behavior.

Table S2

*Unstandardized, Standardized, and Significance Levels for Model in Figure 2 (Standard Errors in Parentheses)*

| <i>Parameter Estimate</i>                                  | <i>Unstandardized</i> | <i>Standardized</i> | <i>p</i> |
|------------------------------------------------------------|-----------------------|---------------------|----------|
| <b>Structural Model: Lag and Cross-Lag Estimates</b>       |                       |                     |          |
| MD Age 2 → MD Age 5                                        | .19 (.04)             | .18                 | .000     |
| OB Age 2 → MD Age 5                                        | 2.65 (1.18)           | .09                 | .024     |
| MD Age 3 → MD Age 5                                        | .24 (.04)             | .23                 | .000     |
| MD Age 4 → MD Age 5                                        | .38 (.04)             | .36                 | .000     |
| OB Age 2 → OB Age 5                                        | .16 (.07)             | .14                 | .036     |
| OB Age 3 → OB Age 5                                        | .19 (.07)             | .18                 | .007     |
| OB Age 4 → OB Age 5                                        | .39 (.07)             | .36                 | .000     |
| MD Age 4 → OB Age 5                                        | .01 (.002)            | .12                 | .016     |
| MD Age 2 → MD Age 4                                        | .25 (.04)             | .25                 | .000     |
| MD Age 3 → MD Age 4                                        | .43 (.04)             | .44                 | .000     |
| OB Age 2 → OB Age 4                                        | .18 (.06)             | .18                 | .005     |
| OB Age 3 → OB Age 4                                        | .33 (.06)             | .34                 | .000     |
| MD Age 2 → MD Age 3                                        | .47 (.04)             | .45                 | .000     |
| OB Age 2 → MD Age 3                                        | 3.76 (1.22)           | .14                 | .002     |
| OB Age 2 → OB Age 3                                        | .41 (.05)             | .40                 | .000     |
| MD Age 2 → OB Age 3                                        | .01 (.002)            | .12                 | .010     |
| <b>Structural Model: Covariance and Residual Estimates</b> |                       |                     |          |
| Covariance between MD Age 5 and OB Age 5                   | .21 (.19)             | .07                 | .264     |
| Covariance between MD Age 4 and OB Age 4                   | .06 (.17)             | .02                 | .711     |
| Covariance between MD Age 3 and OB Age 3                   | .53 (.19)             | .15                 | .006     |
| Covariance between MD Age 2 and OB Age 2                   | -.08 (.21)            | -.02                | .691     |
| Residual for MD Age 5                                      | 74.97 (4.63)          | .43                 | .000     |
| Residual for OB Age 5                                      | .13 (.01)             | .33                 | .000     |
| Residual for MD Age 4                                      | 77.43 (4.64)          | .35                 | .000     |
| Residual for OB Age 4                                      | .12 (.01)             | .24                 | .000     |
| Residual for MD Age 3                                      | 94.96 (5.56)          | .23                 | .000     |
| Residual for OB Age 3                                      | .14 (.01)             | .20                 | .000     |

*Note:*  $\chi^2(8, N = 677) = 5.39, p = .715$ ; CFI = 1.00; RMSEA = .00 [.00, .03]; SRMR = .01. Effects

of covariates not shown. MD = Maternal Depressive Symptoms. OB = Oppositional Behavior.

Table S3

*Unstandardized, Standardized, and Significance Levels for Model in Figure 3 (Standard Errors in Parentheses)*

| <i>Parameter Estimate</i>                            | <i>Unstandardized</i> | <i>Standardized</i> | <i>p</i> |
|------------------------------------------------------|-----------------------|---------------------|----------|
| <b>Structural Model: Lag and Cross-Lag Estimates</b> |                       |                     |          |
| MD Age 2 → MD Age 5                                  | .19 (.04)             | .17                 | .000     |
| MD Age 3 → MD Age 5                                  | .24 (.04)             | .23                 | .000     |
| MD Age 4 → MD Age 5                                  | .38 (.04)             | .37                 | .000     |
| IC Age 4 → MD Age 5                                  | -1.60 (.54)           | -.12                | .003     |
| OB Age 2 → OB Age 5                                  | .10 (.04)             | .08                 | .023     |
| OB Age 3 → OB Age 5                                  | .23 (.05)             | .23                 | .000     |
| OB Age 4 → OB Age 5                                  | .43 (.05)             | .42                 | .000     |
| MD Age 4 → OB Age 5                                  | .01 (.001)            | .11                 | .001     |
| MD Age 2 → MD Age 4                                  | .25 (.04)             | .24                 | .000     |
| MD Age 3 → MD Age 4                                  | .40 (.04)             | .40                 | .000     |
| OB Age 3 → MD Age 4                                  | 2.41 (.88)            | .10                 | .006     |
| IC Age 3 → IC Age 4                                  | .57 (.06)             | .51                 | .000     |
| OB Age 2 → OB Age 4                                  | .17 (.04)             | .14                 | .000     |
| OB Age 3 → OB Age 4                                  | .57 (.04)             | .58                 | .000     |
| IC Age 3 → OB Age 4                                  | -.06 (.02)            | -.10                | .011     |
| MD Age 2 → MD Age 3                                  | .44 (.04)             | .42                 | .000     |
| OB Age 2 → MD Age 3                                  | 4.11 (1.06)           | .14                 | .000     |
| OB Age 2 → IC Age 3                                  | -.32 (.10)            | -.15                | .001     |
| OB Age 2 → OB Age 3                                  | .53 (.04)             | .45                 | .000     |
| MD Age 2 → OB Age 3                                  | .004 (.002)           | .11                 | .004     |
| <b>Structural Model: Covariances and Residuals</b>   |                       |                     |          |
| Covariance between MD Age 5 and OB Age 5             | .70 (.13)             | .25                 | .000     |
| Covariance between MD Age 4 and OB Age 4             | .33 (.12)             | .12                 | .006     |
| Covariance between IC Age 4 and OB Age 4             | -.02 (.01)            | -.07                | .189     |
| Covariance between IC Age 4 and MD Age 4             | -.02 (.36)            | -.004               | .945     |
| Covariance between MD Age 3 and OB Age 3             | .99 (.16)             | .26                 | .000     |
| Covariance between IC Age 3 and OB Age 3             | -.07 (.02)            | -.24                | .000     |
| Covariance between IC Age 3 and MD Age 3             | -1.46 (.37)           | -.20                | .000     |
| Covariance between MD Age 2 and OB Age 2             | .64 (.16)             | .16                 | .000     |
| Residual for MD Age 5                                | 74.42 (4.63)          | .57                 | .000     |
| Residual for OB Age 5                                | .11 (.01)             | .53                 | .000     |
| Residual for MD Age 4                                | 76.31 (4.58)          | .64                 | .000     |
| Residual for IC Age 4                                | .54 (.04)             | .71                 | .000     |
| Residual for OB Age 4                                | .10 (.01)             | .52                 | .000     |
| Residual for MD Age 3                                | 95.01 (5.49)          | .78                 | .000     |
| Residual for IC Age 3                                | .57 (.04)             | .95                 | .000     |
| Residual for OB Age 3                                | .15 (.009)            | .76                 | .000     |

*Note:*  $\chi^2(17, N = 677) = 13.38, p = .711$ ; CFI = 1.0; RMSEA = .00 [.00, .03]; SRMR = .02. Effects of covariates not shown. MD = Maternal Depressive Symptoms. OB = Oppositional Behavior. IC = Inhibitory Control.

Table S4

*Unstandardized, Standardized, and Significance Levels for Model in Figure 4 (Standard Errors in Parentheses)*

| <i>Parameter Estimate</i>                            | <i>Unstandardized</i> | <i>Standardized</i> | <i>p</i> |
|------------------------------------------------------|-----------------------|---------------------|----------|
| <b>Structural Model: Lag and Cross-Lag Estimates</b> |                       |                     |          |
| MD Age 2 → MD Age 5                                  | .19 (.04)             | .18                 | .000     |
| MD Age 3 → MD Age 5                                  | .24 (.04)             | .23                 | .000     |
| MD Age 4 → MD Age 5                                  | .38 (.04)             | .36                 | .000     |
| IC Age 4 → MD Age 5                                  | -1.64 (.56)           | -.13                | .003     |
| OB Age 2 → OB Age 5                                  | .16 (.07)             | .15                 | .032     |
| OB Age 3 → OB Age 5                                  | .18 (.07)             | .17                 | .008     |
| OB Age 4 → OB Age 5                                  | .31 (.07)             | .28                 | .000     |
| IC Age 4 → OB Age 5                                  | -.09 (.03)            | -.19                | .001     |
| MD Age 4 → OB Age 5                                  | .004 (.002)           | .10                 | .036     |
| MD Age 2 → MD Age 4                                  | .26 (.04)             | .25                 | .000     |
| MD Age 3 → MD Age 4                                  | .43 (.04)             | .44                 | .000     |
| IC Age 3 → IC Age 4                                  | .57 (.06)             | .51                 | .000     |
| OB Age 2 → OB Age 4                                  | .14 (.06)             | .14                 | .015     |
| OB Age 3 → OB Age 4                                  | .26 (.06)             | .28                 | .000     |
| IC Age 3 → OB Age 4                                  | -.09 (.03)            | -.17                | .002     |
| MD Age 2 → MD Age 3                                  | .46 (.04)             | .44                 | .000     |
| OB Age 2 → MD Age 3                                  | 3.63 (1.23)           | .13                 | .003     |
| OB Age 2 → IC Age 3                                  | -.43 (.11)            | -.22                | .000     |
| OB Age 2 → OB Age 3                                  | .41 (.05)             | .40                 | .000     |
| MD Age 2 → OB Age 3                                  | .004 (.002)           | .09                 | .029     |
| <b>Structural Model: Covariances and Residuals</b>   |                       |                     |          |
| Covariance between MD Age 5 and OB Age 5             | .14 (.18)             | .05                 | .463     |
| Covariance between MD Age 4 and OB Age 4             | .04 (.17)             | .01                 | .828     |
| Covariance between IC Age 4 and OB Age 4             | -.10 (.02)            | -.41                | .000     |
| Covariance between IC Age 4 and MD Age 4             | -.10 (.36)            | -.02                | .783     |
| Covariance between MD Age 3 and OB Age 3             | .54 (.19)             | .15                 | .005     |
| Covariance between IC Age 3 and OB Age 3             | -.12 (.02)            | -.42                | .000     |
| Covariance between IC Age 3 and MD Age 3             | -1.35 (.37)           | -.19                | .000     |
| Covariance between MD Age 2 and OB Age 2             | -.05 (.21)            | -.01                | .803     |
| Residual for MD Age 5                                | 74.23 (4.61)          | .57                 | .000     |
| Residual for OB Age 5                                | .12 (.01)             | .64                 | .000     |
| Residual for MD Age 4                                | 77.40 (4.64)          | .65                 | .000     |
| Residual for IC Age 4                                | .54 (.04)             | .71                 | .000     |
| Residual for OB Age 4                                | .12 (.01)             | .75                 | .000     |
| Residual for MD Age 3                                | 95.20 (5.57)          | .78                 | .000     |
| Residual for IC Age 3                                | .55 (.04)             | .92                 | .000     |
| Residual for OB Age 3                                | .14 (.01)             | .80                 | .000     |

*Note:*  $\chi^2(17, N = 677) = 20.10, p = .269$ ; CFI = 1.0; RMSEA = .02 [.00, .04]; SRMR = .02. Effects of covariates not shown. MD = Maternal Depressive Symptoms. OB = Oppositional Behavior. IC = Inhibitory Control.

Table S5

*Unstandardized, Standardized, and Significance Levels for Model in Figure 5 (Standard Errors in Parentheses)*

| <i>Parameter Estimate</i>                            | <i>Unstandardized</i> | <i>Standardized</i> | <i>p</i> |
|------------------------------------------------------|-----------------------|---------------------|----------|
| <b>Structural Model: Lag and Cross-Lag Estimates</b> |                       |                     |          |
| MD Age 2 → MD Age 5                                  | .19 (.04)             | .18                 | .000     |
| OB Age 2 → MD Age 5                                  | 2.70 (1.18)           | .10                 | .022     |
| MD Age 3 → MD Age 5                                  | .24 (.04)             | .23                 | .000     |
| MD Age 4 → MD Age 5                                  | .38 (.04)             | .37                 | .000     |
| OB Age 2 → OB Age 5                                  | .15 (.07)             | .14                 | .040     |
| OB Age 3 → OB Age 5                                  | .18 (.07)             | .18                 | .009     |
| OB Age 4 → OB Age 5                                  | .40 (.07)             | .37                 | .000     |
| MD Age 4 → OB Age 5                                  | .01 (.002)            | .12                 | .018     |
| MD Age 2 → MD Age 4                                  | .26 (.04)             | .25                 | .000     |
| MD Age 3 → MD Age 4                                  | .43 (.04)             | .43                 | .000     |
| IC Age 3 → IC Age 4                                  | .52 (.04)             | .51                 | .000     |
| MD Age 3 → IC Age 4                                  | -.01 (.003)           | -.11                | .002     |
| OB Age 2 → OB Age 4                                  | .17 (.06)             | .17                 | .007     |
| OB Age 3 → OB Age 4                                  | .32 (.06)             | .33                 | .000     |
| IC Age 3 → OB Age 4                                  | -.05 (.03)            | -.11                | .030     |
| MD Age 2 → MD Age 3                                  | .47 (.04)             | .45                 | .000     |
| OB Age 2 → MD Age 3                                  | 3.65 (1.23)           | .13                 | .003     |
| MD Age 2 → IC Age 3                                  | -.01 (.003)           | -.15                | .000     |
| OB Age 2 → IC Age 3                                  | -.24 (.10)            | -.13                | .012     |
| OB Age 2 → OB Age 3                                  | .43 (.05)             | .41                 | .000     |
| MD Age 2 → OB Age 3                                  | .01 (.002)            | .13                 | .007     |
| <b>Structural Model: Covariances and Residuals</b>   |                       |                     |          |
| Covariance between MD Age 5 and OB Age 5             | .22 (.19)             | .07                 | .253     |
| Covariance between MD Age 4 and OB Age 4             | .02 (.17)             | .01                 | .926     |
| Covariance between IC Age 4 and OB Age 4             | -.04 (.01)            | -.18                | .001     |
| Covariance between IC Age 4 and MD Age 4             | -.64 (.25)            | -.11                | .010     |
| Covariance between MD Age 3 and OB Age 3             | .51 (.19)             | .14                 | .008     |
| Covariance between IC Age 3 and OB Age 3             | -.04 (.01)            | -.14                | .005     |
| Covariance between IC Age 3 and MD Age 3             | -1.40 (.30)           | -.19                | .000     |
| Covariance between MD Age 2 and OB Age 2             | -.09 (.21)            | -.02                | .652     |
| Residual for MD Age 5                                | 75.23 (4.65)          | .57                 | .000     |
| Residual for OB Age 5                                | .13 (.01)             | .67                 | .000     |
| Residual for MD Age 4                                | 77.41 (4.64)          | .65                 | .000     |
| Residual for IC Age 4                                | .43 (.03)             | .67                 | .000     |
| Residual for OB Age 4                                | .12 (.01)             | .76                 | .000     |
| Residual for MD Age 3                                | 95.01 (5.55)          | .77                 | .000     |
| Residual for IC Age 3                                | .55 (.03)             | .91                 | .000     |
| Residual for OB Age 3                                | .14 (.01)             | .81                 | .000     |

*Note:*  $\chi^2(16, N = 677) = 11.38, p = .785$ ; CFI = 1.0; RMSEA = .00 [.00, .02]; SRMR = .01. Effects of covariates not shown. MD = Maternal Depressive Symptoms. OB = Oppositional Behavior. IC = Inhibitory Control.
